# Supplementary material
Source: publisher figshare collection journal article supplement (https://karger.figshare.com/ndownloader/files/36566439)
Supplement: Supplementary file 1 [file 36566439]

## Supplementary Figure Legends

### Fig. S1. Administration of fexofenadine prevented scratching behavior induced by histamine injection.

Counts of scratching bouts consisting of two or more strokes were shown. Counts of bouts of two or three strokes (parameters: Beats range 2-3, Area range 0.005-1) were added to the data shown in **Fig. 3C**, in which counts of bouts consisting of four or more strokes were shown. \* $p < 0.05$  by the Mann-Whitney  $U$  test. *i.p.*: intraperitoneal administration. *i.d.*: intradermal administration. *FEXO*: fexofenadine.

### Fig. S2. Gating strategies for Figure 5.

Gating strategies for Th ( $CD4^+CD3^+$ ) (**A**), Tc ( $CD8^+CD3^+$ ) (**B**) and  $\gamma\delta$ T cells ( $\gamma\delta TCR^+CD3^+$ ) (**C**) and those with enhanced expression of signature transcription factors.

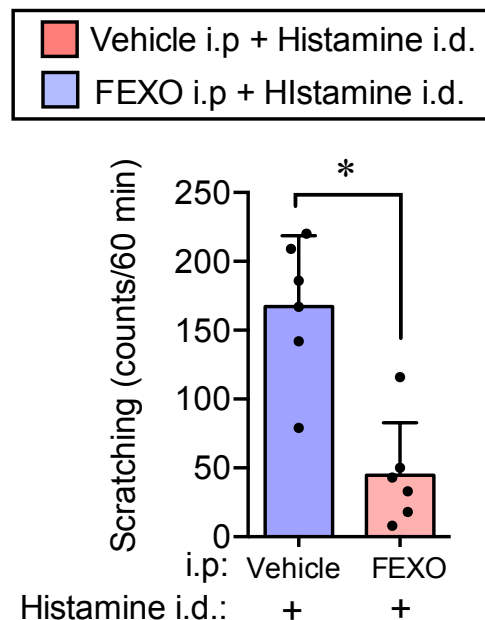

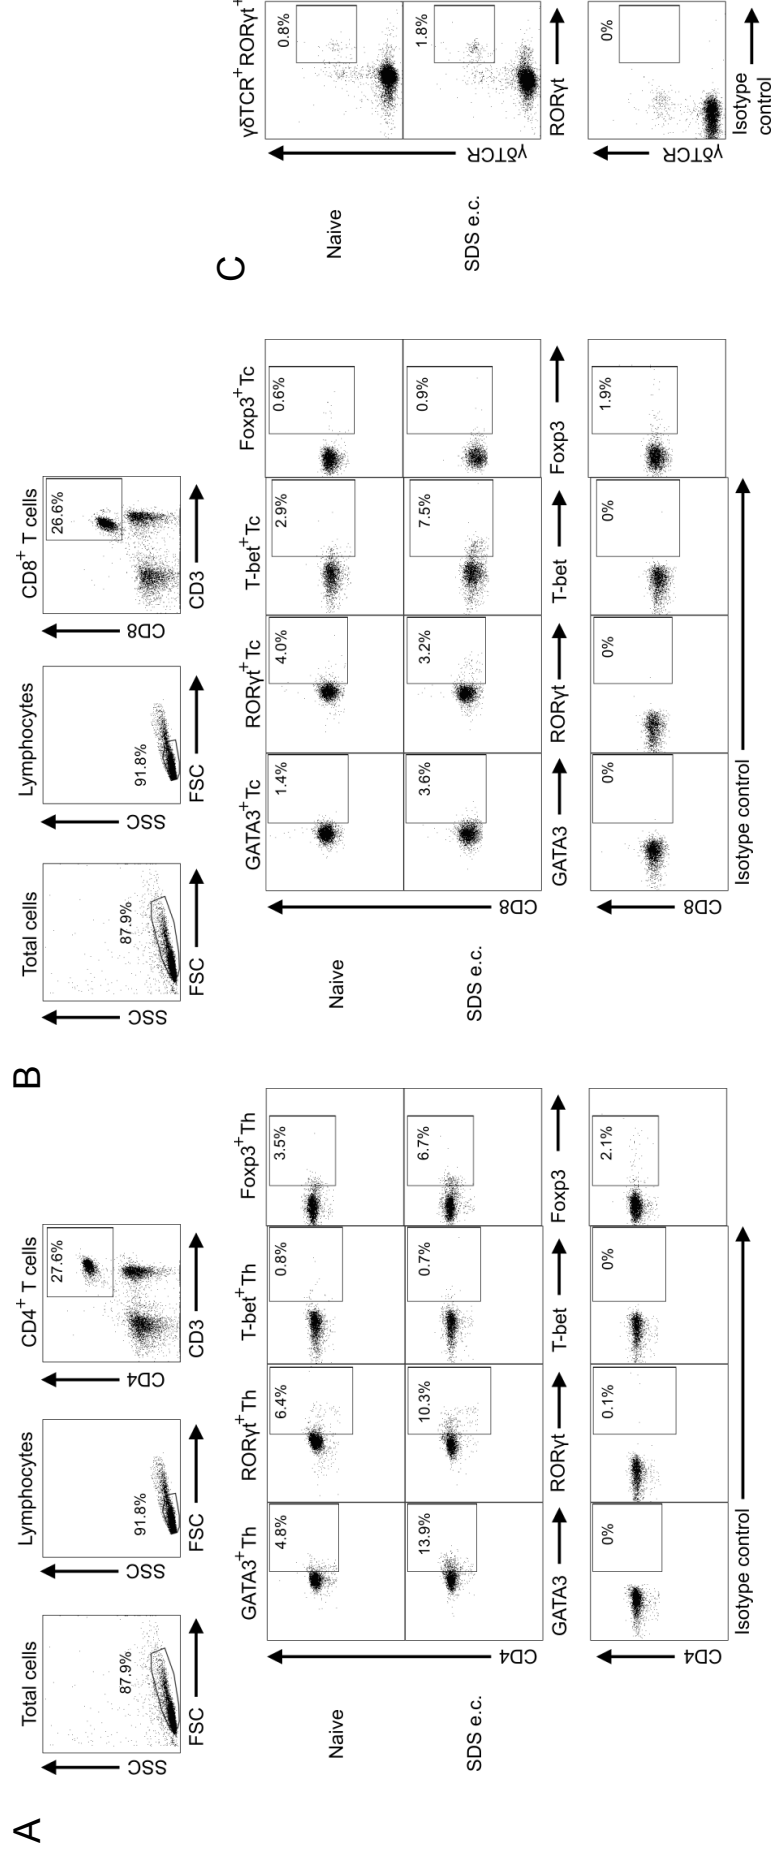

Masutani et al. Fig. S2
